# Supplementary material for: Metabolism‐associated molecular classification of hepatocellular carcinoma
Source: PubMed Central journal article supplement (PMC7138397; doi:10.1002/1878-0261.12639), 2020-01-29

Before removing batch effect

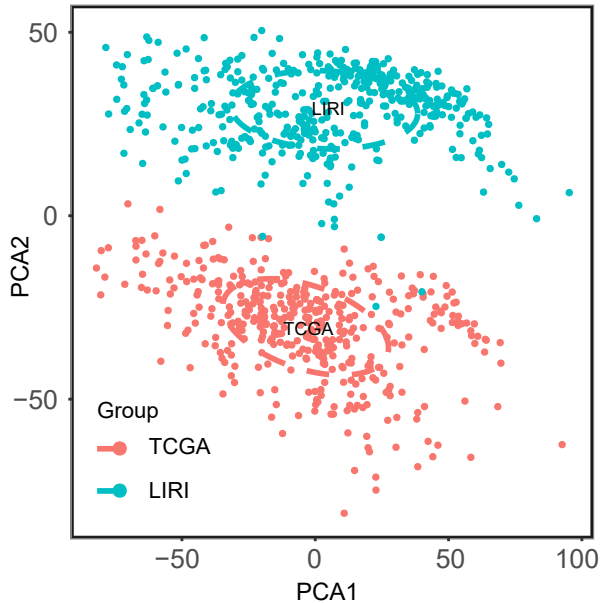

After removing batch effect

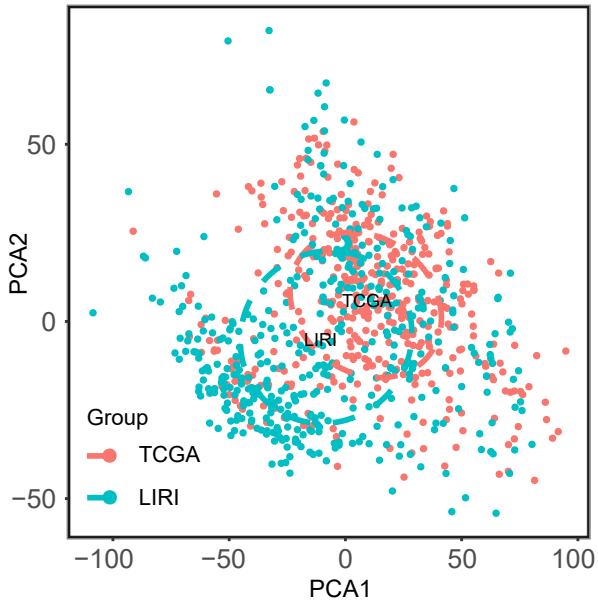

Supplement: MOL2-14-896-s001.pdf [file MOL2-14-896-s001.pdf]
