# Supplementary material for: Metabolism‐associated molecular classification of hepatocellular carcinoma
Source: PubMed Central journal article supplement (PMC7138397; doi:10.1002/1878-0261.12639), 2020-01-29
Supplement: MOL2-14-896-s004.pdf [file MOL2-14-896-s004.pdf]

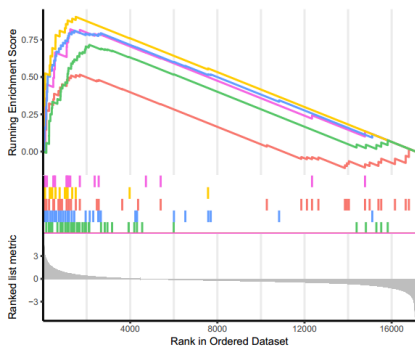

- Alanine, aspartate and glutamate metabolism
- Arginine biosynthesis
- Glycine, serine and threonine metabolism
- Primary bile acid biosynthesis
- Valine, leucine and isoleucine degradation

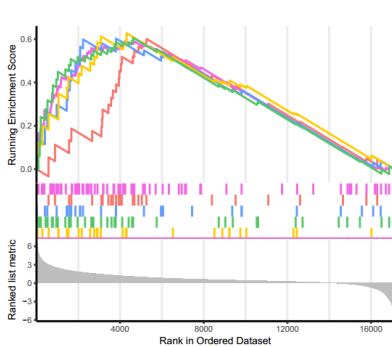

- Asthma
- ECM-receptor interaction
- Glycosphingolipid biosynthesis - lacto and neolacto series
- Mucin type O-glycan biosynthesis
- Nicotine addiction

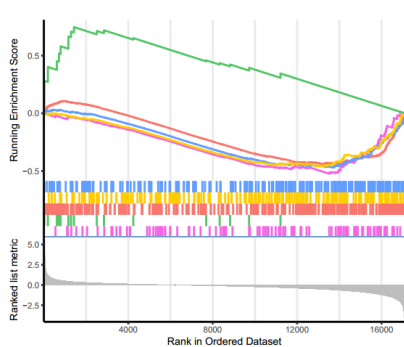

- Neuroactive ligand-receptor interaction
- Parathyroid hormone synthesis, secretion and action
- Proteoglycans in cancer
- Regulation of actin cytoskeleton
- Steroid biosynthesis
