# Supplementary material for: Metabolism‐associated molecular classification of hepatocellular carcinoma
Source: PubMed Central journal article supplement (PMC7138397; doi:10.1002/1878-0261.12639), 2020-01-29

### GO enrichment analysis of C1 specific genes

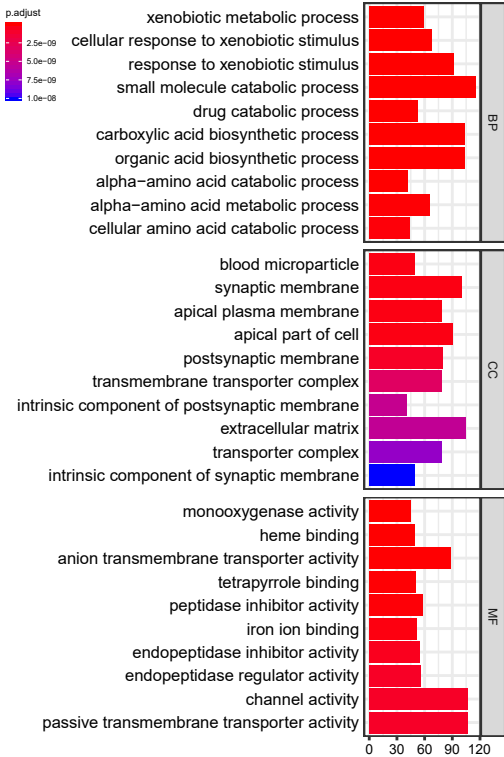

### GO enrichment analysis of C2 specific genes

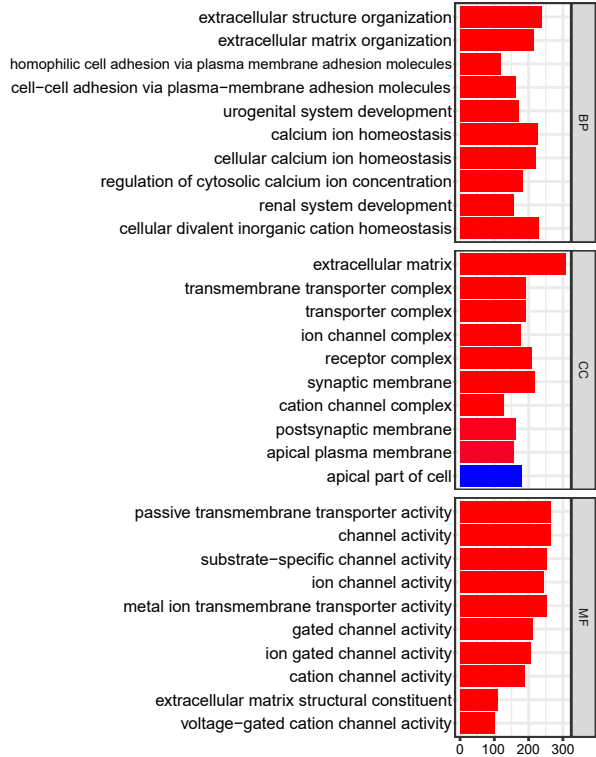

### GO enrichment analysis of C3 specific genes

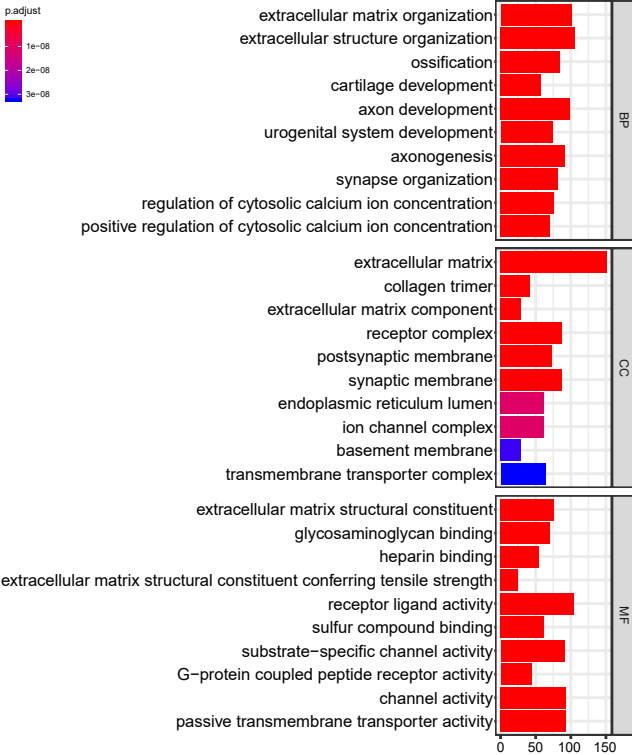

Supplement: MOL2-14-896-s005.pdf [file MOL2-14-896-s005.pdf]
